1 Adoption and consequences of new light-fishing technology (LEDs) on Lake Tanganyika, East  
2 Africa

3

4 Huruma Mgana<sup>1,2\*</sup>, Benjamin M. Kraemer<sup>3#a</sup>, Catherine M. O'Reilly<sup>4</sup>, Peter A. Staehr<sup>5</sup>, Ismael  
5 A. Kimirei<sup>1</sup>, Colin Apse<sup>6</sup>, Craig Leisher<sup>6</sup>, Magnus Ngoile<sup>2</sup>, Peter B. McIntyre<sup>3,#b</sup>

6 <sup>1</sup>Tanzania Fisheries Research Institute, Kigoma, Tanzania

7 <sup>2</sup>Department of Fisheries and Aquatic Sciences, University of Dar es Salaam, Dar es Salaam,  
8 Tanzania

9 <sup>3</sup>Center for Limnology, University of Wisconsin, Madison, Wisconsin, USA

10 <sup>4</sup>Department of Geography, Geology, and the Environment, Illinois State University, Normal,  
11 Illinois, USA

12 <sup>5</sup>Department of Bioscience, Aarhus University, Roskilde, Denmark

13 <sup>6</sup>The Nature Conservancy, Arlington, Virginia, USA

14 <sup>#a</sup> Current address: IGB Leibniz institute of Freshwater Ecology and Inland Fisheries, Berlin,  
15 Germany

16 <sup>#b</sup> Current address: Department of Natural Resources, Cornell University, Ithaca, New York,  
17 USA

18

19 \* Corresponding Author:

20 E-mail: [hmgana@gmail.com](mailto:hmgana@gmail.com) (HM)

21

22 Key words: Pelagic fishing; Lake Tanganyika; shift in lighting systems; influence to fisheries

## 23 **Abstract**

24 Maintaining sustainable fisheries requires understanding the influence of technological advances  
25 on catch efficiency. Fisheries using light sources for attraction could be widely impacted by the  
26 shift to light emitting diode (LED) light systems. We studied the transition from kerosene  
27 lanterns to LED lamps in Lake Tanganyika, East Africa, examining factors that led to adoption  
28 as well as the impact of the new light sources on fish catch and composition. We used a  
29 combination of field experiments with catch assessments, fisher surveys, underwater light  
30 spectra measurements, and cost assessments to evaluate the impact of switching from kerosene to  
31 LED lamps. Overall, we found a very rapid rate of adoption of homemade outdoor LED light  
32 systems in Lake Tanganyika. Most of the batteries used to power these lamps were charged from  
33 the city power grid, rather than photovoltaic cells. The LED light spectra was distinct from the  
34 kerosene light and penetrated much deeper into the water column. Regardless of light type, most  
35 of the fish caught within the two dominant species were below maturity, indicating that current  
36 fishery is not sustainable. Although the LED lamps were associated with a slight increase in  
37 catch, environmental factors, particularly distance offshore, were generally more important in  
38 determining fish catch size and composition. The main advantages of the LED lamps were the  
39 lower operating costs and their robustness in bad weather. Overall, the use of battery-powered  
40 LED lighting systems to attract fish in Lake Tanganyika appears to reduce economic costs but  
41 not contribute new impacts on the fishery.

42

## 43 **Introduction**

44 Fish are a critical natural resource, and artisanal fisheries provide a key source of protein to  
45 many people around the world (1). If managed properly, fisheries can be considered a renewable

46 resource (2), but advances in technology periodically allow for new access and extraction, and  
47 require reassessment of sustainable harvesting. Many changes related to the adoption of new  
48 technologies in artisanal fisheries are not documented nor properly assessed, and thus cannot be  
49 properly integrated into management strategies (3).

50

51 An important natural resource, the pelagic fishery in Lake Tanganyika, East Africa, faces a  
52 number of challenges. This critical fishery substantially contributes to poverty reduction (annual  
53 earnings of USD 10 million or greater) and provides food security in all riparian countries  
54 (Tanzania, Burundi, The Democratic Republic of Congo, and Zambia). Explicitly, the lake's  
55 pelagic fish catches are vital source of food and livelihoods to millions of people living in the  
56 lake basin (4, 5). Presently, fishing pressure is very high with declines in catch per unit effort in  
57 some areas of the lake and the potential for local overfishing (5-7). There are also some  
58 indications of destructive fishing methods due to increased presence of illegal fishing gears (8).  
59 These issues of fisheries conservation and sustainability are widespread, as similar challenges  
60 exist in the other East African Great lakes as well as other inland lakes and reservoirs(9, 10).

61

62 Understanding the impacts of changes in fish gear is broadly important for many African lakes,  
63 and light attraction is one of the essential factors in pelagic fisheries (3, 11-13). Historically,  
64 fishermen used fire to create light to attract and aggregate fish at night for catching them by lift  
65 net, eventually switching to kerosene presume lamps (4, 14, 15). Recently, however, there has  
66 been a switch in the lighting gears from kerosene to light emitting diode (LED) lamp systems,  
67 and the effects of this on catch size and composition is unknown.

68

69 This study aimed to assess the costs of potential consequences of switching from using kerosene  
70 lanterns to various types of LEDs systems in Lake Tanganyika. Our overall aim was 1) to  
71 understand factors that influence the adoption of this new LED lighting technology and 2) to  
72 determine whether LED systems influence overall fish catch and composition.

73

#### 74 **Material and methods**

75 This study was conducted on Lake Tanganyika, in the northwestern region of the lake near  
76 Kigoma, Tanzania (Fig 1). Fishing is an important part of the community; in the Kigoma area in  
77 2011, there were approximately 10,600 fishermen and 4,800 fishing crafts respectively of which  
78 27% were lift net fishing units employing approximately 7,800 fishermen as crew (National  
79 Coordination Unit, 2011). The lake's pelagic fishery is composed of six species, two endemic  
80 clupeids *Stolothrissa tanganyicae* and *Limnothrissa miodon*, and four endemic centropomids of  
81 the genus *Lates* (4, 16) (*Lates angustifrons*, *Lates mariae*, *Lates stappersii*, and *Lates*  
82 *microlepis*). Of these, the clupeids ('dagaa') and *L. stappersii* ('migebuka') are the dominant part  
83 of the catch.

84

85 Artisanal fishing in the pelagic zone is conducted using liftnets (6-8 mm mesh) with artificial  
86 light during dark nights (3, 4, 15). Catch is dominated by clupeids (70-80%) followed by *L.*  
87 *stappersii* (5-15%), with by-catches of cichlids, catfishes and large *Lates* (3). Inshore areas of the  
88 lake are known to be breeding grounds for clupeids and nursery for some *Lates* species (3, 4),  
89 as well as permanently habited by cichlid fishes (17), so catch composition is influenced by  
90 fishing location.

91

92 In order to establish influence of lamp types on catches, three similar fishing units at Katonga  
93 were used to compare catches among traditional kerosene lamps ('karabai') and two types of  
94 LED lamps, with lamps rotating monthly among units from the end of the dry season (5 October  
95 2015) into the early wet season (1 January 2016). The first LED lamp commonly being used are  
96 outdoor LED lights (Model: B-10W) purchased locally and combined into a multi-light system  
97 called 'spesho' (hereinafter, LED-S). The second LED system was a commercially available  
98 LED system manufactured by Rex Energy (hereinafter, LED-R) (bulbs; Hella Sea Hawk XL  
99 12/2W LED 0950 series), which is currently becoming available in local markets. The wattage  
100 per meter squared was similar among lamp types and fishing units always set more than a  
101 kilometre apart.

102

103 We measured the total weight of the daily catch using a field hanging scale. One to three  
104 homogenized handfuls of the fish sample (approximately 0.5-1.0 kg) were used for species  
105 composition analysis. Individual fishes from each taxon were weighed to the nearest 0.1 gram  
106 using a top-loading digital scale (Huazhi Sai Xijie electronic balance, model; TP-A1000), and  
107 their total lengths (TL) measured to the nearest millimetre from the tip of the mouth to the largest  
108 caudal ray.

109

110 To assess whether there were differences in how deep the light from the different lamps  
111 penetrated into the water column, we measured the spectral properties of each lamp at night. A  
112 submersible Stellarnet BLACK-Comet-SR Spectrometer (model, BLK CXR) measured light  
113 from 400 to 700 nm at depth (5- 467 cm) and we used standard exponential light attenuation  
114 models to calculate the depth, which a single photon of light would reach. A questionnaire

115 survey was conducted to assess the rapidity of the switch from kerosene lamps to LED lamps at  
116 two landing sites near Kigoma, Kibirizi to the north and Katonga to the south.

117

118 We collected some of the main environmental parameters known to influence fish catch such as  
119 moon phases, fishing distance from the shore (that correlates with water depth) and wind speed  
120 (3). The distance of each fishing site from shore was determined from GPS locations provided by  
121 fishers and calculated using QGIS. On nights when GPS data were not available, we estimated  
122 fishing location from travel time and bearing, as recorded by the boat captain using a Suunto  
123 manual diving compass (model SK4). Average wind speed was calculated for the period of  
124 fishing using measurements from an onshore weather station located at TAFIRI-Kigoma. The  
125 weather instrument used was Vantage Pro2 (model: 6162EU, Davis Instruments, USA) located at  
126 a height of 12 m above the ground. The potential moonlight was estimated as the average moon  
127 fullness fraction integrated over the hours when fishing lamps were used, based on moon fullness  
128 calendars (<http://aa.usno.navy.mil/data/docs/MoonFraction.php>), and moonrise/moonset times  
129 ([http://aa.usno.navy.mil/data/docs/RS\\_OneDay.php](http://aa.usno.navy.mil/data/docs/RS_OneDay.php)). We refer to this as “potential” moonlight  
130 because it does not account for cloud cover.

131

132 A Boosted Regression Tree (BRT) statistical model was used to factor out the potential influence  
133 of environmental variables. The BRT model is a combination of regression decision trees and a  
134 boosting algorithm that can account for non-linear relationships between predictor variables and  
135 the response, missing predictor data, and interactions between categorical and numeric predictor  
136 variables (18). BRT analysis was completed using the “dismo”(19) and “gbm”(20) packages in  
137 R. All BRTs were fit with a model complexity value of “5” allowing for high levels of

138 interactive effects between predictor variables. After fitting the BRT model, we used it to remove  
139 the influence of all variables other than lamp type on total daily catches. We did this using the  
140 equation

$$141 \\ 142 \quad C_i = r_i + C_{lamp} \quad (1)$$

143  
144 Where  $C_i$  is the  $i^{\text{th}}$  observation of total catches with variability attributed to all other variables  
145 other than lamp type removed,  $r_i$  is the model residual associated with the  $i^{\text{th}}$  observation, and  
146  $C_{lamp}$  is the modelled estimate of total daily catches estimated for each lamp type holding all  
147 other predictor variables at their median. We used a similar approach to examine influence on  
148 fish size for the three main species.

149

## 150 **Results**

151 There was rapid adoption of LED systems for night fishing. All respondents (n=26) who were  
152 interviewed were from Kibirizi and Katonga landing sites. The composition constituted boat  
153 crews (n=17), boat owners (n=8), and boat owners who practiced fishing by themselves with  
154 other crewmembers (n=1). All respondents acknowledged having used LEDs and kerosene lamps  
155 at some point in their lifetime as light sources for fishing. The shifts towards using LED lamp  
156 systems began in 2010 (Fig 2). Between 2010 and 2012, fishermen used an improvised LED  
157 system locally called ‘umua’, as the outdoor LED bulbs now used to build LED lamps (‘spesho’)  
158 were not yet available. ‘Umua’ are made by dismantling circuits from LED flashlights and then  
159 attaching these inside hemispheres of big stainless steel bowls or housings of outdoor flood  
160 lights. The major shift happened after 2014 when outdoor LED bulbs became available, at which

161 point more than 90% (n=24) of the respondents were using LED lamps. All respondents  
162 indicated that they no longer use the pressurized kerosene and have switched to homemade  
163 ‘spesho’ LED lamps between 10 to 22 LED bulbs rated between 3 - 10 watts; nobody used  
164 manufactured LED lamps (LED-R). Most respondents (n=17) believed that LED provided them  
165 with better catches.

166

167 The operating costs were cheaper for LED systems relative to kerosene lamps. A single kerosene  
168 lamp requires 1 -2 litres of kerosene daily (US \$ 0.92 per litre during this period) as well as other  
169 replacement parts (US \$ 9.0 per month). As fishing is typically done 20 days per lunar cycle, the  
170 monthly operating cost for one kerosene lamp is approximately US \$50. In contrast, LED  
171 systems had monthly costs of \$4-6 with daily battery charging. Batteries were charged at  
172 established kiosks at the landing sites and cost around US \$0.92-1.40 per day. Typically, the  
173 charge lasts one to two nights of fishing, and each fishing unit uses two batteries (i.e. one battery  
174 per fishing boat). Most of the batteries being used to run the LED systems were being charged  
175 from the city main power supply (73%) (Fig 3). Only 15% of the respondents used solar panels,  
176 while 12% alternated between city power and solar panel charging kiosks to charge their  
177 batteries during the rainy season.

178

179 The adoption of LED lamps has been straightforward. Fishers did not require changes the size  
180 and dimensions of most of their accessories used in fishing, including the lift-net sizes and the  
181 lengths of the poles for hauling the net and holding the lamps. Boat size and number of  
182 fishermen have remained the same as when kerosene lamps were being used, and the depth to  
183 which they deploy their liftnets was still the same (around 100 m).



184

185 In terms of light energy emission, the LED lamps outperformed kerosene lamps. Light  
186 attenuation was greatest for kerosene lamps ( $K_d = 1.66 \text{ m}^{-1}$ ), followed by the manufactured  
187 (LED-R) and homemade 'spesho' (LED-S) systems. ( $K_d = 0.53 \text{ m}^{-1}$  and  $0.46 \text{ m}^{-1}$  respectively).  
188 Correspondingly, the depth at which one photon of light would be present from each lamp type  
189 was deepest for LED-S (125 m), followed by LED-R (120 m), and considerably shallower for  
190 the kerosene light (70 m).

191

192 Catches with LED lamps were slightly higher than the catches with kerosene lamps, but variation  
193 was explained primarily by environmental conditions (Table 1). Total daily catches ranged from  
194 0 to 1476 kg of fish per boat per lamp type per night with a mean catch of 76 kg and a median  
195 catch of 21 kg. For total catch, the BRT model performed well as observed and modeled data  
196 were highly correlated ( $r = 0.79$ , Kendall rank correlation) with a median absolute error of 1.95  
197 kg. The model also revealed that lamp type had a weak average effect on the total daily catches  
198 of fish per boat pair compared to the other predictors in the BRT model (relative influence =  
199 8.2%) (Table 1). The distance from the shoreline, moonlight, and wind speed were found to be  
200 influential factors in the amount of fish caught per day per fishing unit, where their relative  
201 influences were 36.7, 22.2 and 11.8% respectively (Fig 3). Distance from shore was important up  
202 until about 5 km, beyond which it did not strongly influence catch. The duration of lighting, time  
203 net was hauled, and lamp type were less important when compared with the previous three  
204 environmental variables (relative influence of 8.9, 7.8 and 7.2% respectively; Fig 3). Within the  
205 lamp types, fishers using 'spesho' LED-S (30.9%) and manufactured LED-R (66.0%) lamps

206 caught more fish as compared to fishers who were using kerosene lamps. Finally, boat owners  
207 had no influence on the daily catches.

208

209 After removing the variability in *L. stappersi* catches attributed to other factors, fishers using  
210 LED-S and LED-R lamps caught more *L. stappersi* on average (about 2.9% and 5.2% more,  
211 respectively) than fishers using kerosene lamps (Table 1). The BRT model for *L. stappersi* total  
212 catches performed poorly with observed and modelled data weakly correlated ( $r = 0.35$ , Kendall  
213 rank correlation) and a median absolute error of 3.13 kg. Lamp type had a weaker than average  
214 effect on the total daily catches of fish per boat pair compared to the other seven predictors in the  
215 BRT model (relative influence = 3.2). Lamp type accounted for only 4.1-7.6 % of the variation in  
216 average fish size explained by boosted regression trees.

217

218 Overall, the clupeids *S. tanganyicae* and *L. miodon* made up the bulk of the fish biomass caught  
219 during the experiment by contributing about 87% of the total catches (Fig 4). *L. stappersii* were  
220 also common but rarely dominated the total catches (12%). The remainder of the catch was  
221 composed of a range of species. These included the killifish *Lamprichthys tanganyicae* and the  
222 deep-water cichlid *Bathybates* that feeds on pelagic species. *Chelaethiops boulenger* is a pelagic  
223 cyprinid found in the Malagarasi River and the pelagic and coastal zones of Lake Tanganyika.  
224 Moreover, although rarely, nearshore demersal fish species (mainly cichlids) were also caught.  
225 Occasionally, pelagic shrimp ranging from 1-2 cm long were found in the fish catches and some  
226 sponges that are commonly found on soft-bottom in the lake were also recorded.

227

228 **Discussion**

229 The rapid adoption of LED lamps was driven by the relatively low operating costs compared to  
230 kerosene lamps. Our estimate of about US\$50 per month operating costs for the use of a single  
231 kerosene lamp is similar to the cost found for the East African region by (21). The operating  
232 costs of LED lamps were eight to twelve times lower than kerosene lamps. For a complete  
233 economic analysis, the lifetimes and costs associated with the batteries would also need to be  
234 incorporated. The adoption of the LED lamps has led to the replacement of kerosene-selling  
235 kiosks with businesses associated with battery charging powered by city grid or diesel generators  
236 in remote areas. There are sustainable ways of charging LED lamp batteries by using solar panels  
237 (21, 22), but the initial investment cost in solar panels is high for an individual fishing team. The  
238 shift toward outdoor LEDs bulbs began in 2013, when they became available in local shops  
239 around Kigoma at a reasonable price (US\$5 per bulb). The ability to design lower-cost, locally  
240 appropriate LED lamps is probably one of the contributing factors for the adoption (21), as LED  
241 systems (such as LED-R) made for specifically for fishing are expensive (US\$175) relative to  
242 what is earned from fishing (21).

243

244 The LED lamps also performed better in poor weather conditions compared to kerosene lamps.  
245 In addition to the low operating costs, fishers mentioned robustness of LED lamps as being  
246 among the reasons that inspired the shift. Some of the fishermen reported that on wavy nights,  
247 they have inadvertently submerged the LED lamps in water repeatedly without them being  
248 damaged. Thus, the robustness of the LED lamps allows them to perform better in wet and windy  
249 conditions compared to kerosene lamps, something that has not been noted specifically by other  
250 studies of artisanal fisheries (21-23).

251

252 Lamp type had only a minor effect on catch size. LED lamps resulted in slightly higher catches  
253 than kerosene lamps (Table 1), and units that were fishing by using LED-S and LED-R had  
254 slightly higher catches per unit effort compared to units equipped with kerosene lamps. The  
255 deeper depth of the LED light may be the reason for this slight impact on catch size. Catches did  
256 not differ between the two different LED lamp types, whether they were locally made from  
257 outdoor LEDs (LED-S) or a specialty LED for fishing (LED-R). Other studies examining a shift  
258 to LED light have mostly occurred in marine systems and typically find a large impact of using  
259 LED lamps relative to metal halide (24, 25) or compact fluorescent lamps (26). However, as was  
260 found here, the impact on efficiency appears to come primarily from fuel savings, whereas  
261 increases in net catch were typically minimal (24-26). An exception might be in a large  
262 Mediterranean lake, where the introduction of LED lamp rafts to replace kerosene lamps  
263 increased catch by 67% (22).

264  
265 Lamp type did not have any effect on catch composition. The three species that were dominant in  
266 the fish catches are also dominant in the pelagic zone, where there are six species in total the four  
267 centropomids and two clupeids (4, 5). Even though their contribution was small, the other  
268 species that were caught are typically associated with near-shore or shallow environment (e.g.  
269 cichlids and sponges), consistent with the GPS coordinates provided by the fishermen showing  
270 fishing near the shoreline on some occasions (Fig 1). Sometimes the fishermen decide to fish  
271 nearshore because they believe the catch will be better and to save cruising fuel. In some cases,  
272 this decision is due to bad weather, and since our study period included months in the rainy  
273 season, strong storms could have occurred that affected their decision-making. Interestingly, the  
274 catches of small pelagic shrimp imply that nets were mended in such a way, potentially

275 deliberately, that mesh size is reduced as the net is hauled up. Overall, lift net fishing closer to  
276 the shore results in greater catches of juveniles (3); however, the extent to which this could  
277 influence the overall fishery and lake ecology is complex (27).

278

279 Patchiness in pelagic fish catches is broadly recognized and is due to a range of factors,  
280 including environmental parameters, resource availability, predator-prey interaction,  
281 intraspecific relationships and habitat use (3, 28, 29). In our study, wind speed and moonlight  
282 were the main factors other than distance from the shore that affected fish catch. During high  
283 winds, rough water surface affects the beaming angle of light and refractions are more likely to  
284 happen. If the drifting speed is too high; fish may not stay with the lamp light. Moonlight  
285 counteracts the artificial lamp light and makes it less likely that fish congregate around artificial  
286 lamps placed close to the fishing nets, so fishermen generally do not fish during full moon (3, 4).  
287 The patchy spatial distribution of fishes (Fig 1) is reflected in the fact that the current variation in  
288 daily catches is only partially explained (21%) by the environmental variables we had included  
289 in our analysis.

290

291 Overall, we found that adoption of the new LED lamp technology on Lake Tanganyika was rapid  
292 and cost-effective, but the long-term environmental impacts were hard to discern. Our results  
293 concur with previous studies (23), indicating that increases in catch are small and the benefits of  
294 using LED lamps come primarily in terms of cost savings in kerosene fuel. If used in direct  
295 replacement of kerosene lamps, the observed transition to LEDs lamps may not have major  
296 effects on the fishery as long as the number of fishing boats remains constant. The LED lamps  
297 substantially reduce daily operating costs, but are not necessarily a clean technology, as city

298 power or generators do most battery charging. Additionally, we recommend proper disposal of  
299 the lead-acid batteries being used by fishermen to power their lamps. Since fishermen will  
300 continue fishing during bad weather with the LED lamps (whereas with kerosene lamps they  
301 would not), future work could look at potential impacts on long-term fish catches and fishing  
302 pressure. Similarly, the cost efficiency of using LED lamps has potentially contributed to the  
303 emergent use of auxiliary boats with LED lamps, as well as an increase in the number of LEDs  
304 per unit, both of which could ultimately have an influence on catches.

305

### 306 **Acknowledgements**

307 We thank Peter Limbu at The Nature Conservancy (TNC) for help with logistical arrangements  
308 and Omary Kashushu for help with field work and data collection, as well as staff at Tanzania  
309 Fisheries Research Institute for assistance and support. We thank the fishermen and boat owners  
310 for participating and the Beach Management Units at Kibirizi and Katonga and the municipal  
311 fisheries officers for allowing us to conduct the surveys and assisting with the selection of boat  
312 owners.

313

### 314 **Author contribution statement**

315

316 HM, BMK, PBM, IK, CA, MN designed the study approach. HM, BMK, PBM, IK designed the  
317 experiment. BMK and HM wrote and administered the survey. HM, BMK, IK collected fisheries  
318 data, on which CL conducted QA/QC. PS and HM collected spectral data. BMK, HM, PS, IK  
319 conducted analyses. HM, BMK, and CMO made figures and tables. HM, BMK, and CMO wrote  
320 sections of the manuscript, and all authors contributed to revision and editing.

321

## 322 **References**

- 323 1. Costello C, Gaines SD, Lynham J. Can catch shares prevent fisheries collapse? *Science*.  
324 2008;321(5896):1678-81.
- 325 2. Worm B, Hilborn R, Baum JK, Branch TA, Collie JS, Costello C, et al. Rebuilding global  
326 fisheries. *science*. 2009;325(5940):578-85.
- 327 3. Munyandorero J. The Lake Tanganyika clupeid and latid fishery system: indicators and problems  
328 inherent in assessments and management. 2002.
- 329 4. Coulter GW. Lake Tanganyika and its life: British Museum (Natural History) and Oxford  
330 University Press; 1991.
- 331 5. Mölsä H, Reynolds J, Coenen E, Lindqvist O. Fisheries research towards resource management  
332 on Lake Tanganyika. *Hydrobiologia*. 1999;407:1-24.
- 333 6. Cirhuza DM, Micha J-C, Ntakimazi G, Muderhwa N. Brief evaluation of the current state of fish  
334 stocks landed by artisanal fishing units from the extreme northwest part of Lake Tanganyika.  
335 *International Journal of Fisheries and Aquatic Studies*. 2015;2:41-8.
- 336 7. Sarvala J, Salonen K, Järvinen M, Aro E, Huttula T, Kotilainen P, et al. Trophic structure of Lake  
337 Tanganyika: carbon flows in the pelagic food web. *From Limnology to Fisheries: Lake Tanganyika and*  
338 *Other Large Lakes*: Springer; 1999. p. 149-73.
- 339 8. Van der Knaap M, Katonda K, De Graaf G. Lake Tanganyika fisheries frame survey analysis:  
340 Assessment of the options for management of the fisheries of Lake Tanganyika. *Aquatic Ecosystem*  
341 *Health & Management*. 2014;17(1):4-13.
- 342 9. Van der Knaap M. May we eat biodiversity? How to solve the impasse of conservation and  
343 exploitation of biodiversity and fishery resources. *Aquatic ecosystem health & management*.  
344 2013;16(2):164-71.

- 345 10. Jamu D, Banda M, Njaya F, Hecky RE. Challenges to sustainable management of the lakes of  
346 Malawi. *Journal of Great Lakes Research*. 2011;37:3-14.
- 347 11. Ben-Yami M. *Attracting fish with light*: Food & Agriculture Org.; 1988.
- 348 12. Downing AS, van Nes EH, Balirwa JS, Beuving J, Bwathondi P, Chapman LJ, et al. Coupled  
349 human and natural system dynamics as key to the sustainability of Lake Victoria's ecosystem services.  
350 2014.
- 351 13. Weyl O, Kazembe J, Booth A, Mandere D. An assessment of a light-attraction fishery in southern  
352 Lake Malawi. *African Journal of Aquatic Science*. 2004;29(1):1-11.
- 353 14. van Zwieten PAM, Roest FC, Machiels MAM, van Densen WLT. Effects of inter-annual  
354 variability, seasonality and persistence on the perception of long-term trends in catch rates of the  
355 industrial pelagic purse-seine fishery of northern Lake Tanganyika (Burundi). *Fisheries Research*.  
356 2002;54(3):329-48.
- 357 15. Kimirei I, Mgaya Y, Chande A. Changes in species composition and abundance of commercially  
358 important pelagic fish species in Kigoma area, Lake Tanganyika, Tanzania. *Aquatic ecosystem health &*  
359 *management*. 2008;11(1):29-35.
- 360 16. Patterson G, Makin J. *The State of Biodiversity in Lake Tanganyika-A Literature Review*.  
361 Chatham, UK: Natural Resource Institute; 1998.
- 362 17. Konings A. *Tanganyika cichlids in their natural habitat*: Cichlid Press El Paso; 1998.
- 363 18. Elith J, Leathwick JR, Hastie T. A working guide to boosted regression trees. *Journal of Animal*  
364 *Ecology*. 2008;77(4):802-13.
- 365 19. Hijmans R, Elith J. *dismo: Species Distribution ModelingR package (Version 1.1-4)*  
366 <https://CRAN.R-project.org/package=dismo>. 2016.
- 367 20. Ridgeway G, Ridgeway MG. *The gbm package*. R Foundation for Statistical Computing, Vienna,  
368 Austria. 2004;5(3).
- 369 21. Mills E, Gengnagel T, Wollburg P. Solar-LED alternatives to fuel-based lighting for night  
370 fishing. *Energy for Sustainable Development*. 2014;21:30-41.



- 371 22. Kehayias G, Bouliopoulos D, Chiotis N, Koutra P. A photovoltaic-battery-LED lamp raft design  
372 for purse seine fishery: Application in a large Mediterranean lake. *Fisheries Research*. 2016;177:18-23.
- 373 23. McHenry M, Doepel D, Onyango B, Opara U. Small-scale portable photovoltaic-battery-LED  
374 systems with submersible LED units to replace kerosene-based artisanal fishing lamps for Sub-Saharan  
375 African lakes. *Renewable Energy*. 2014;62:276-84.
- 376 24. Shikata T, Yamashita K, Shirata M, Machida Y. Performance evaluation of fishing lamp using  
377 oval-shaped blue LEDs for squid jigging fishery in offshore fishing grounds in the Sea of Japan. *Nippon*  
378 *Suisan Gakkaishi*. 2012;78(6):1104-11 (in Japanese with English abstract).
- 379 25. Matsushita Y, Azuno T, Yamashita Y. Fuel reduction in coastal squid jigging boats equipped  
380 with various combinations of conventional metal halide lamps and low-energy LED panels. *Fisheries*  
381 *Research*. 2012;125:14-9.
- 382 26. Susanto A, Irnawati R, Mustahal M, Syabana MA. Fishing efficiency of LED lamps for fixed lift  
383 net fisheries in Banten Bay indonesia. *Turkish Journal of Fisheries and Aquatic Sciences*.  
384 2017;17(2):283-91.
- 385 27. Garcia S, Kolding J, Rice J, Rochet M-J, Zhou S, Arimoto T, et al. Reconsidering the  
386 consequences of selective fisheries. *Science*. 2012;335(6072):1045-7.
- 387 28. Muška M, Tušer M, Frouzová J, Mrkvička T, Ricard D, Sed'a J, et al. Real-time distribution of  
388 pelagic fish: combining hydroacoustics, GIS and spatial modelling at a fine spatial scale. *Scientific*  
389 *reports*. 2018;8(1):5381.
- 390 29. Phiri H, Shirakihara K. Distribution and seasonal movement of pelagic fish in southern Lake  
391 Tanganyika. *Fisheries Research*. 1999;41(1):63-71.

392

393

394 Table and Figure captions

395

396 Table 1: Results from the Boosted Regression Tree analyses showing differences among the  
397 lamp types for fish catch and size. Units are kg for catch, g for fish size.

398

399 Fig 1. Map of the study site near Kigoma Bay, Tanzania on Lake Tanganyika. The adoption  
400 survey of fishermen was conducted at Kibirizi and Katonga villages. The assessment of fish  
401 catches was done at Katonga village. Colours represent water depth in the region. Circle size  
402 represents size of the catch. Inset shows the region of the study in northwestern Lake  
403 Tanganyika.

404

405 Fig 2. Cumulative percentage (%) of fishers switching from kerosene lanterns to LED-based  
406 lighting systems, showing the rapid adoption of this technology.

407

408 Fig 3. The relative importance of 7 drivers of fish catch variability. While the kind of light used  
409 has a small effect on fish catches, this effect is outweighed by other drivers of fish catch  
410 variability.

411

412 Fig 4. Species composition by weight of all fish caught in the study as a function of fishing lamp  
413 type.

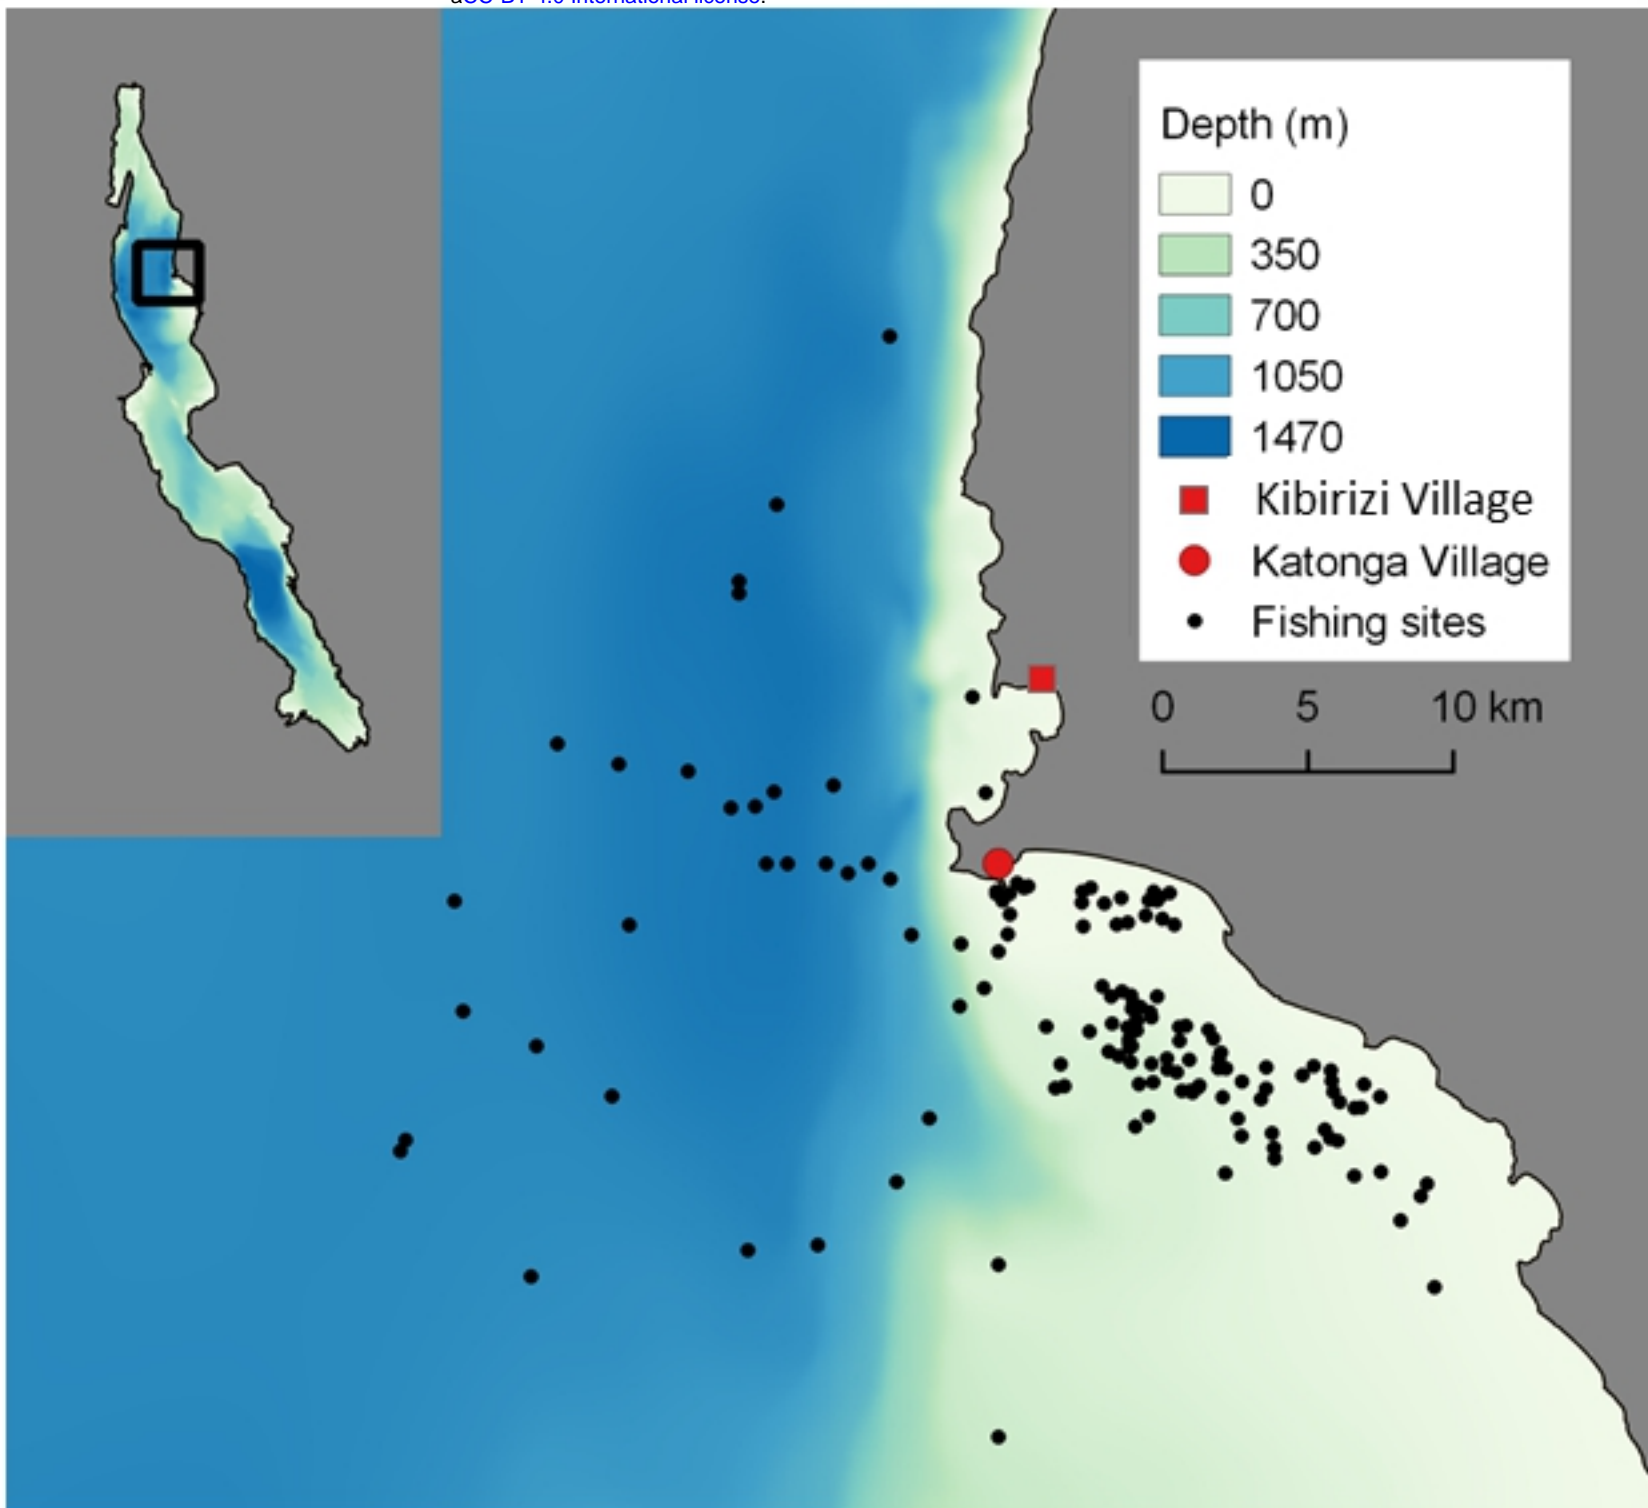

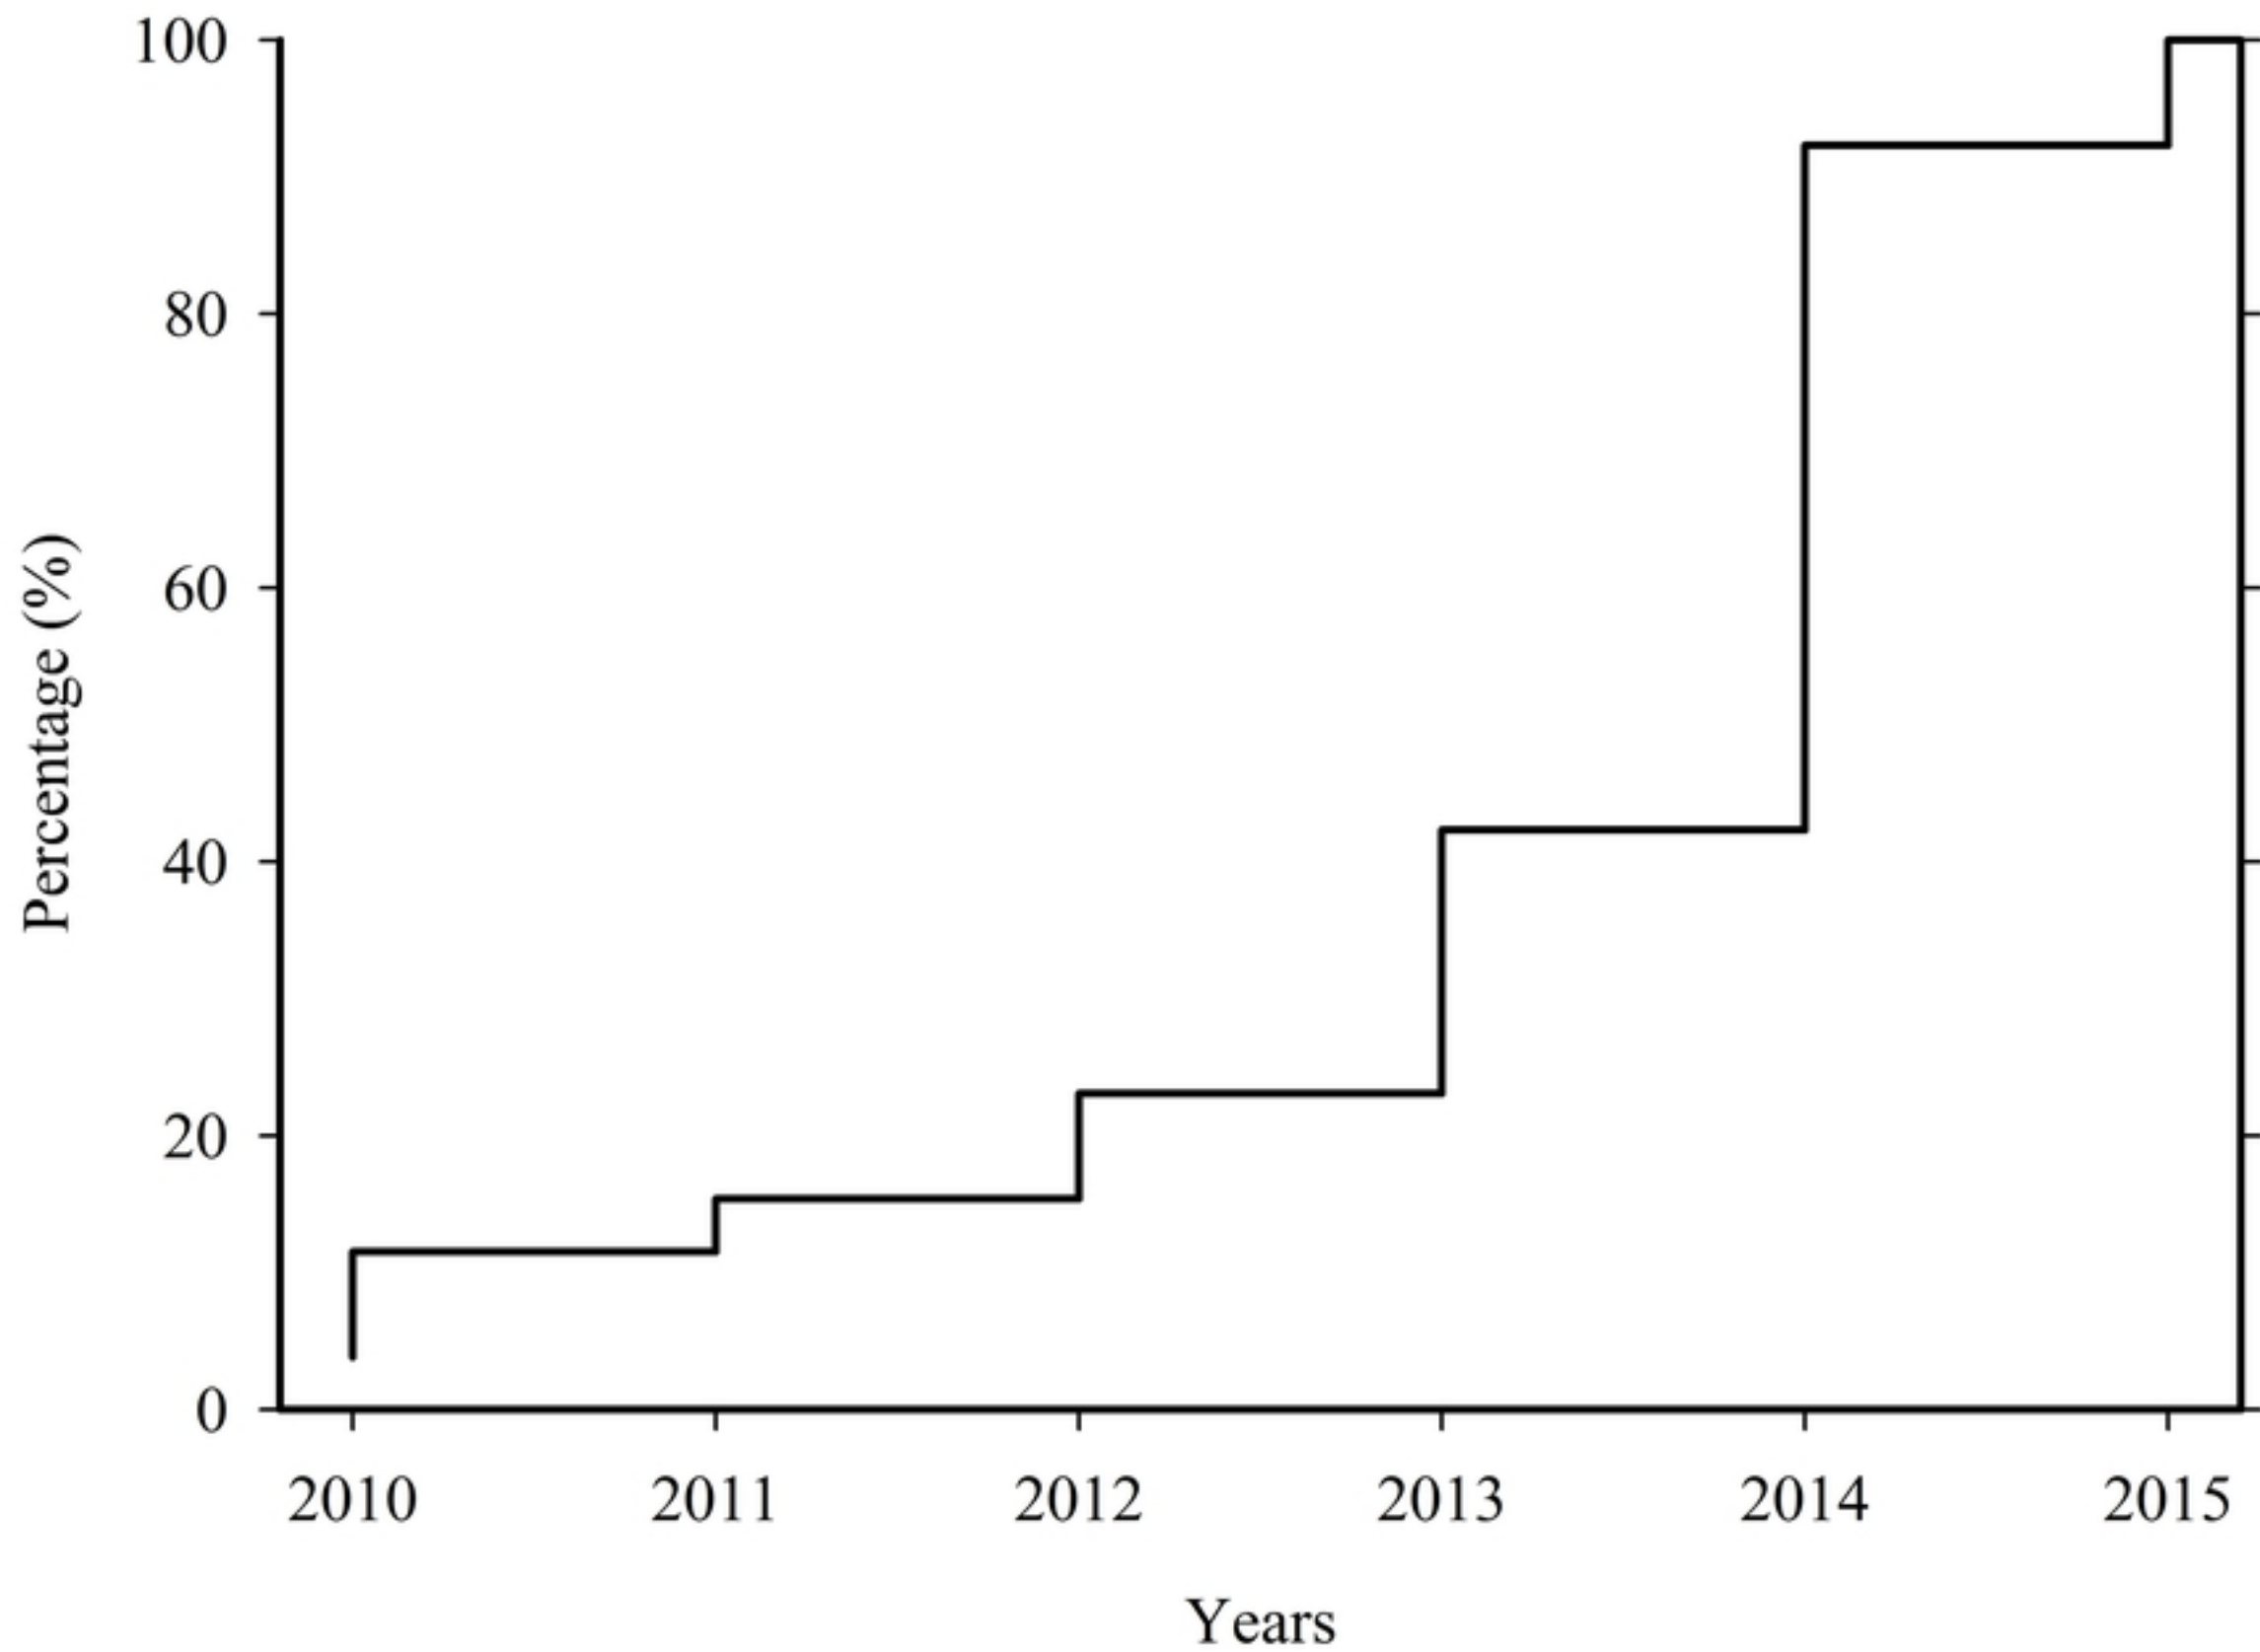

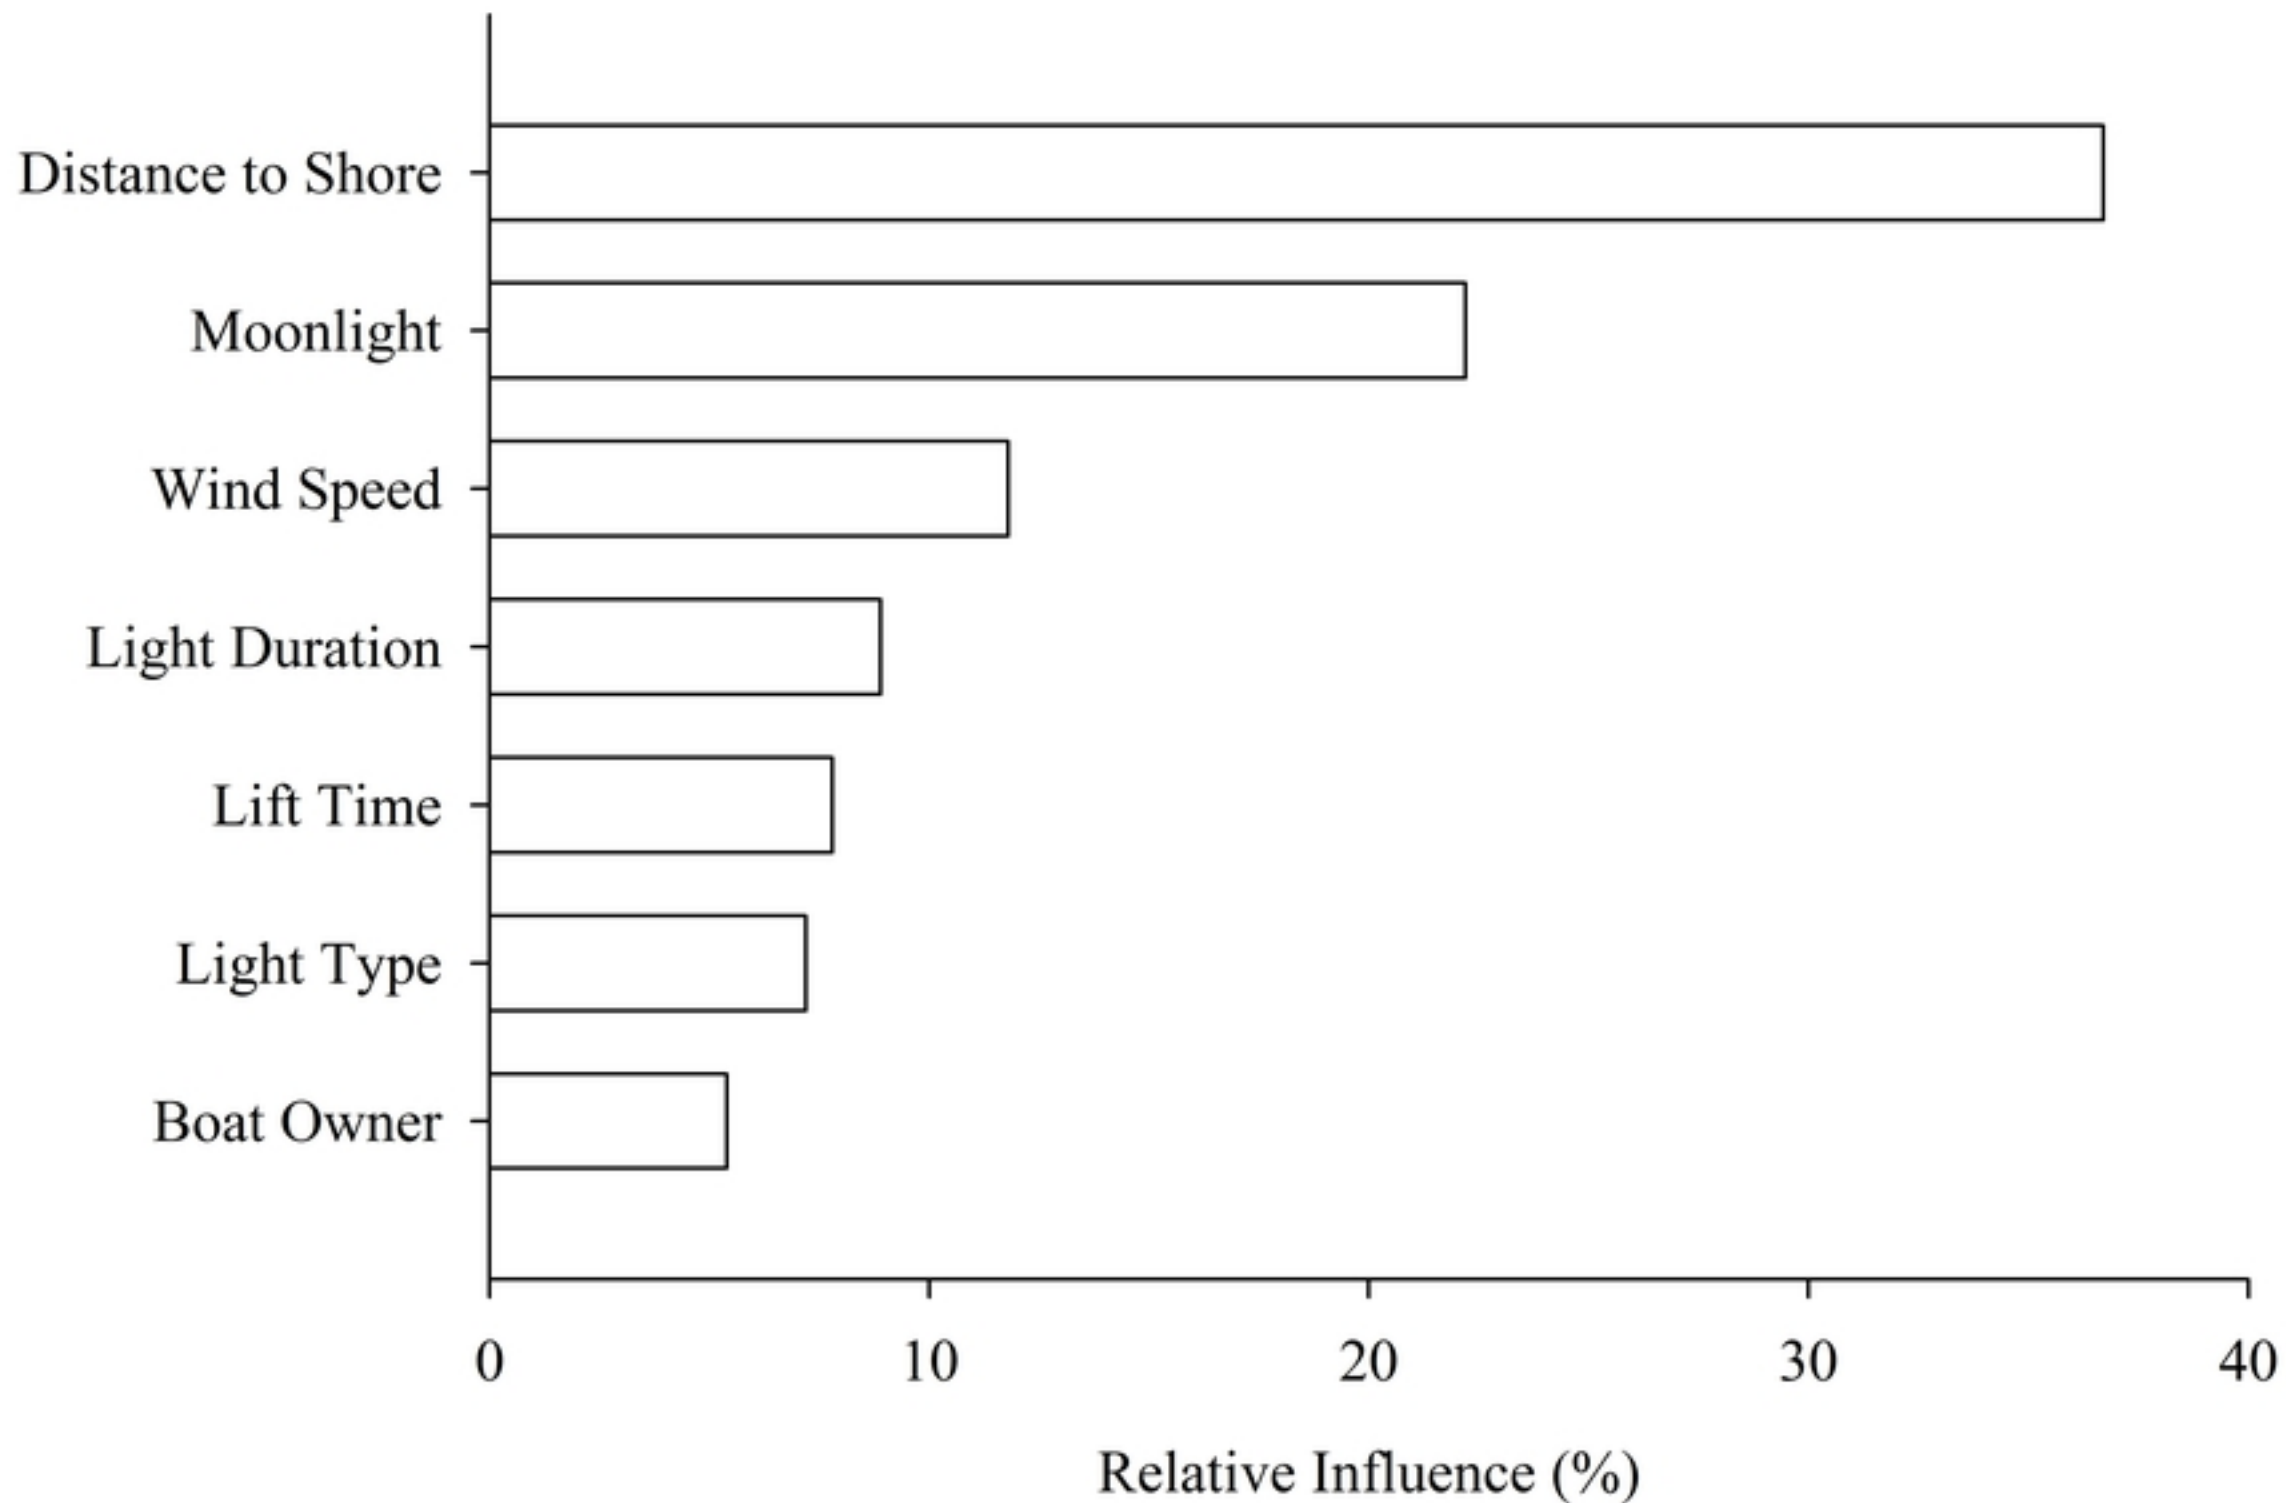

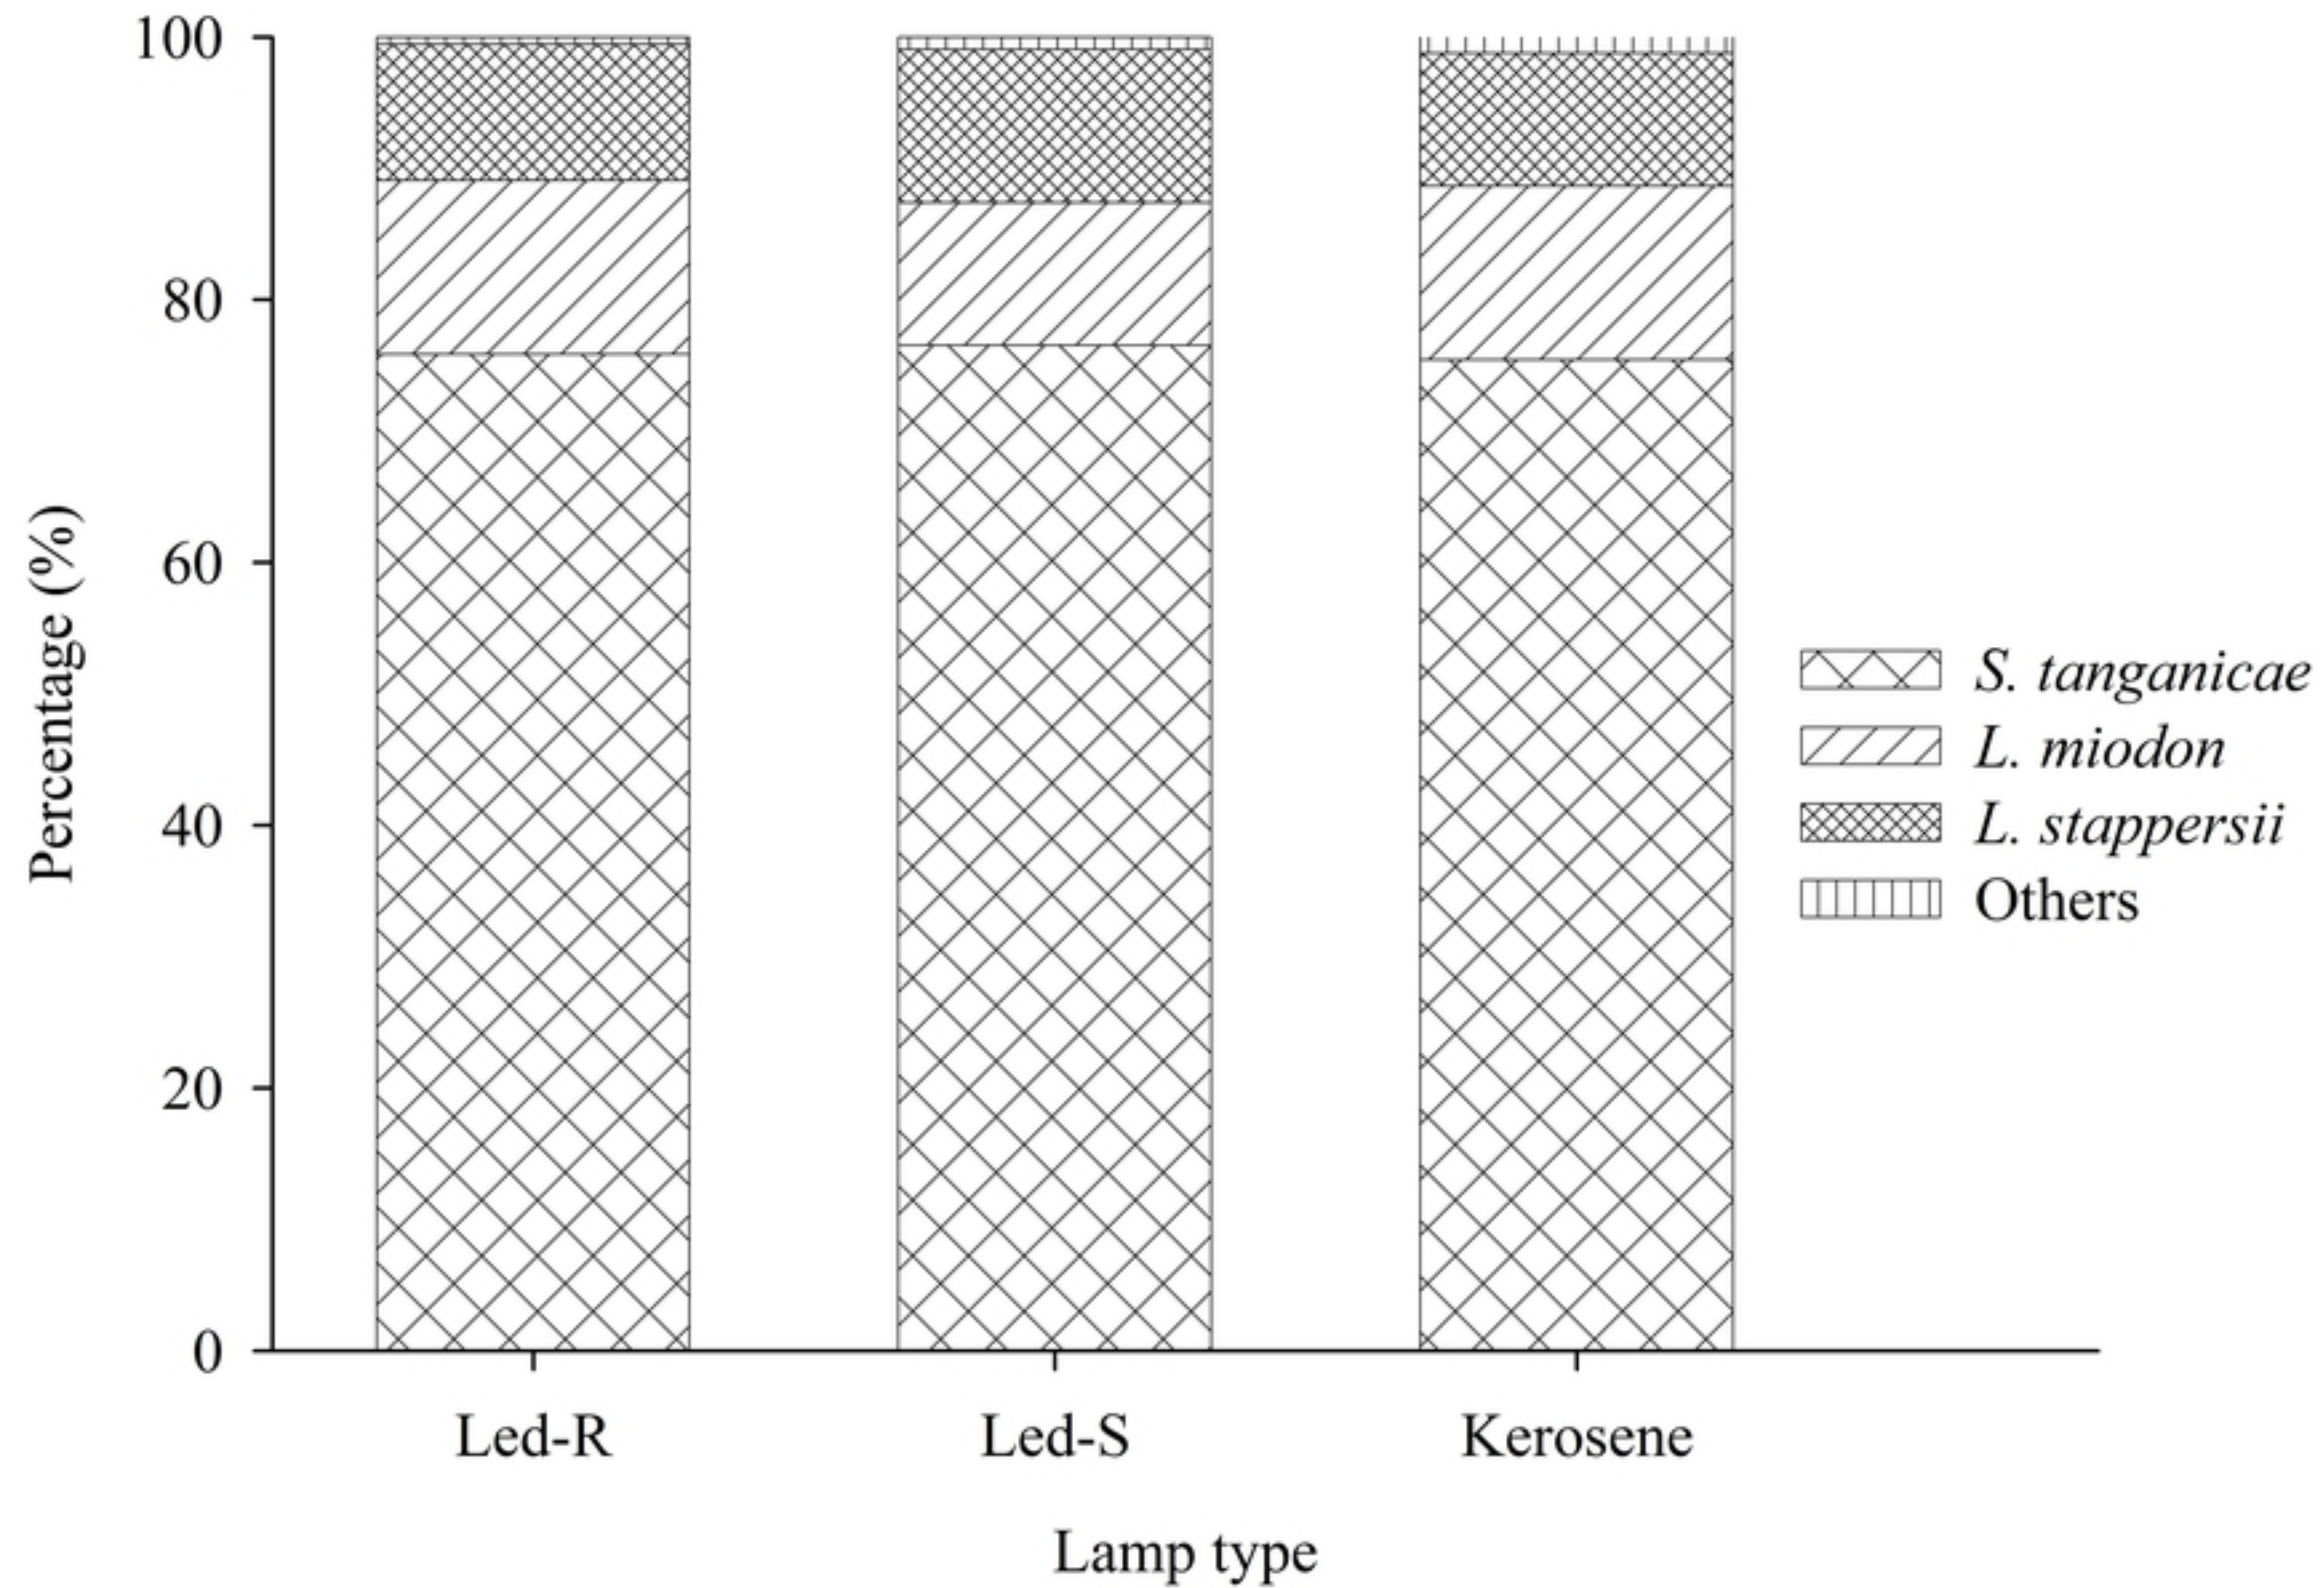

Table 1:

|                                                | Total catch | Catch <i>L. stappersi</i> | Catch clupeids | Size <i>L. stappersi</i> | Size <i>S. tanganicae</i> | Size <i>L. miodon</i> |
|------------------------------------------------|-------------|---------------------------|----------------|--------------------------|---------------------------|-----------------------|
| Relative influence of light type (%)           | 8.19        | 3.16                      | 8.22           | 3.71                     | 2.37                      | 9.41                  |
| Model mean absolute error                      | 1.95        | 3.13                      | 1.73           | 1.38                     | 0.36                      | 2.77                  |
| Correlation between modelled and observed data | 0.79        | 0.35                      | 0.70           | 0.47                     | 0.52                      | 0.43                  |
| Median with Karosene                           | 14.1        | 1.00                      | 14.8           | 25.33                    | 1.68                      | 8.22                  |
| Median with LED-S                              | 14.5        | 1.00                      | 14.7           | 25.38                    | 1.77                      | 9.80                  |
| Median with LED-R                              | 18.4        | 1.02                      | 20.7           | 25.46                    | 1.74                      | 9.99                  |

bioRxiv preprint doi: <https://doi.org/10.1101/619007>; this version posted April 25, 2019. The copyright holder for this preprint (which was not certified by peer review) is the author/funder, who has granted bioRxiv a license to display the preprint in perpetuity. It is made available under aCC-BY 4.0 International license.
